# Supplementary material for: Chaperone ligand-discrimination by the TPR-domain protein Tah1
Source: PubMed Central journal article supplement — Biochem J. 2008 Jun 26;413(Pt 2):261–8. doi: 10.1042/BJ20080105 (PMC2865030; doi:10.1042/bj20080105), 2008-06-26
Supplement: bj4130261add.pdf [file bj4130261add.pdf]

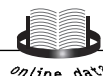

SUPPLEMENTARY ONLINE DATA

Chaperone ligand-discrimination by the TPR-domain protein Tah1

Stefan H. MILLSON\*, Cara K. VAUGHAN†, Chao ZHAI‡, Maruf M. U. ALI†, Barry PANARETOU‡, Peter W. PIPER\*, Laurence H. PEARL† and Chrisostomos PRODROMOU†<sup>1</sup>

\*Department of Molecular Biology and Biotechnology, The University of Sheffield, Firth Court, Western Bank, Sheffield S10 2TN, U.K., †Section of Structural Biology, The Institute of Cancer Research, Chester Beatty Laboratories, 237 Fulham Road, London SW3 6JB, U.K., and ‡Pharmaceutical Science Research Division, King's College London, Franklin-Wilkins Building, 150 Stamford Street, London SE1 9NH, U.K.

|      | TPR1-H1a                                                                                                                                                                                                                                                                    | TPR1-H1b                                                                                                             | TPR1-H2a  |           |
|------|-----------------------------------------------------------------------------------------------------------------------------------------------------------------------------------------------------------------------------------------------------------------------------|----------------------------------------------------------------------------------------------------------------------|-----------|-----------|
| Hop  | -MEQVNELK <b>KE</b> GNK <b>AL</b> SVGNIDDA <b>L</b> QC <b>Y</b> SE <b>AI</b> KLDPH-NH <b>V</b> LY <b>SN</b> RS <b>AA</b> Y <b>AK</b> KG <b>DY</b> Q <b>KAY</b>                                                                                                              |                                                                                                                      |           | 58        |
| Stil | MS <b>L</b> T <b>A</b> DE <b>Y</b> <b>K</b> Q <b>Q</b> G <b>NA</b> A <b>FT</b> AKDYDK <b>AI</b> EL <b>FT</b> KA <b>IE</b> VSE <b>TP</b> NH <b>V</b> LY <b>SN</b> RS <b>AC</b> Y <b>T</b> SL <b>KK</b> FSD <b>AL</b>                                                         |                                                                                                                      |           | 60        |
| Tah1 | -----                                                                                                                                                                                                                                                                       | -----                                                                                                                | -----     |           |
|      | TPR1-H2b                                                                                                                                                                                                                                                                    | TPR1-H3a                                                                                                             | TPR1-H3b  | TPR1-Hc   |
| Hop  | ED <b>G</b> CK <b>T</b> VD <b>L</b> KPD <b>W</b> KG <b>G</b> YS <b>R</b> KA <b>AA</b> LE <b>EF</b> L <b>N</b> RF <b>E</b> E <b>AK</b> RT <b>Y</b> EE <b>GL</b> KHE <b>AN</b> NP <b>Q</b> L <b>KE</b> GL <b>Q</b> N <b>ME</b> AR                                             |                                                                                                                      |           | 118       |
| Stil | ND <b>AN</b> E <b>CV</b> K <b>IN</b> PS <b>W</b> SK <b>GY</b> N <b>RL</b> G <b>AA</b> HL <b>GL</b> GD <b>L</b> DE <b>AE</b> SN <b>Y</b> KK <b>A</b> LE <b>L</b> D <b>AS</b> N <b>KA</b> AK <b>E</b> GL <b>D</b> Q <b>V</b> H <b>RT</b>                                      |                                                                                                                      |           | 120       |
| Tah1 | -----                                                                                                                                                                                                                                                                       | -----                                                                                                                | -----     | -----     |
| Hop  | LAERK-----FMNPFNPNLYQKLESDPRTRTLSDPTYRELIEQLRNKPSDLGTLQ-                                                                                                                                                                                                                    |                                                                                                                      |           | 171       |
| Stil | QQARQAQPD <b>L</b> GL <b>T</b> Q <b>L</b> FAD <b>PN</b> L <b>IE</b> N <b>L</b> K <b>KN</b> P <b>K</b> T <b>SE</b> MM <b>K</b> D <b>P</b> Q <b>L</b> V <b>AK</b> L <b>IG</b> Y <b>K</b> Q <b>N</b> P <b>Q</b> A <b>IG</b> Q <b>D</b> L <b>FT</b>                             |                                                                                                                      |           | 180       |
| Tah1 | -----                                                                                                                                                                                                                                                                       |                                                                                                                      |           |           |
| Hop  | DPRIM <b>T</b> LS <b>V</b> LL <b>G</b> VD <b>L</b> GS <b>M</b> DE <b>EE</b> E <b>I</b> AT <b>PP</b> PP-----PP                                                                                                                                                               |                                                                                                                      |           | 204       |
| Stil | D <b>P</b> RL <b>M</b> T <b>I</b> MA <b>T</b> LM <b>G</b> VD <b>L</b> N <b>M</b> DD <b>I</b> Q <b>S</b> NS <b>M</b> P <b>K</b> E <b>P</b> ET <b>S</b> KS <b>T</b> E <b>Q</b> KK <b>DA</b> E <b>P</b> Q <b>S</b> D <b>S</b> T <b>T</b> SK <b>EN</b> SS <b>K</b> AP           |                                                                                                                      |           | 240       |
| Tah1 | -----                                                                                                                                                                                                                                                                       |                                                                                                                      |           |           |
|      | TPR2a-H1a                                                                                                                                                                                                                                                                   | TPR2a-H1b                                                                                                            |           |           |
| Hop  | PKKETK-PEPMEEDLPENKQALKE <b>KE</b> L <b>G</b> ND <b>A</b> Y <b>KK</b> DFD <b>T</b> AL <b>K</b> H <b>Y</b> DK <b>AK</b> EL <b>D</b> PT <b>N</b> M <b>Y</b> IT                                                                                                                |                                                                                                                      |           | 263       |
| Stil | Q <b>KE</b> ES <b>KE</b> SE <b>P</b> ME <b>V</b> DE <b>DD</b> SK <b>IE</b> AD <b>KE</b> <b>KA</b> E <b>G</b> N <b>K</b> F <b>Y</b> KAR <b>Q</b> F <b>DE</b> <b>AI</b> E <b>H</b> Y <b>N</b> KA <b>W</b> EL <b>H</b> -K <b>D</b> I <b>T</b> Y <b>L</b> N                     |                                                                                                                      |           | 299       |
| Tah1 | -----                                                                                                                                                                                                                                                                       | -----                                                                                                                |           |           |
|      | TPR2a-H2a                                                                                                                                                                                                                                                                   | TPR2a-H2b                                                                                                            | TPR2a-H3a | TPR2a-H3b |
| Hop  | N <b>Q</b> A <b>V</b> Y <b>F</b> E <b>K</b> G <b>D</b> Y <b>N</b> K <b>CR</b> EL <b>CE</b> KA <b>IE</b> V <b>G</b> REN <b>RE</b> D <b>Y</b> R <b>Q</b> I <b>AK</b> AY <b>AR</b> I <b>G</b> NS <b>Y</b> F <b>KE</b> E <b>K</b> Y <b>K</b> D <b>AI</b> H <b>F</b> Y           |                                                                                                                      |           | 323       |
| Stil | N <b>R</b> AA <b>E</b> Y <b>E</b> K <b>G</b> E <b>Y</b> E <b>T</b> A <b>I</b> ST <b>L</b> ND <b>AVE</b> Q <b>G</b> RE <b>M</b> R <b>AD</b> Y <b>K</b> V <b>IS</b> K <b>S</b> F <b>AR</b> I <b>G</b> N <b>AY</b> H <b>KL</b> G <b>D</b> L <b>KK</b> T <b>IE</b> Y <b>Y</b>   |                                                                                                                      |           | 359       |
| Tah1 | -----                                                                                                                                                                                                                                                                       | -----                                                                                                                | -----     | -----     |
|      | TPR2a-Hc                                                                                                                                                                                                                                                                    | TPR2b-H1a                                                                                                            | TPR2b-H1b |           |
| Hop  | N <b>K</b> SL <b>AE</b> H <b>R</b> T <b>P</b> D <b>V</b> L <b>K</b> CK <b>Q</b> Q <b>AE</b> K <b>IL</b> KE <b>Q</b> ER <b>L</b> AY <b>IN</b> PD <b>L</b> AL <b>E</b> E <b>K</b> N <b>K</b> G <b>NE</b> CF <b>Q</b> K <b>G</b> D <b>Y</b> P <b>Q</b> AM <b>K</b> H <b>Y</b>  |                                                                                                                      |           | 383       |
| Stil | Q <b>K</b> SL <b>TE</b> H <b>R</b> T <b>AD</b> I <b>L</b> TK <b>L</b> R <b>NA</b> E <b>K</b> EL <b>KK</b> AE <b>AE</b> Y <b>V</b> NP <b>E</b> KA <b>EE</b> A <b>RL</b> E <b>G</b> KE <b>Y</b> FT <b>KS</b> D <b>W</b> PN <b>AV</b> K <b>AY</b>                              |                                                                                                                      |           | 419       |
| Tah1 | -----                                                                                                                                                                                                                                                                       | MS <b>Q</b> F <b>E</b> K <b>Q</b> KE <b>Q</b> G <b>NS</b> L <b>FK</b> Q <b>GL</b> Y <b>RE</b> AV <b>H</b> C <b>Y</b> |           | 27        |
|      |                                                                                                                                                                                                                                                                             | : : : * : . * : : : * : : *                                                                                          |           |           |
|      | TPR2b-H2a                                                                                                                                                                                                                                                                   | TPR2b-H2b                                                                                                            | TPR2b-H3a |           |
| Hop  | TE <b>AI</b> K <b>R</b> NP <b>K</b> DA <b>K</b> LY <b>SN</b> RA <b>AC</b> Y <b>TK</b> LL <b>E</b> F <b>Q</b> L <b>AL</b> K <b>D</b> CE <b>E</b> CI <b>Q</b> LE <b>PT</b> FI <b>G</b> Y <b>TR</b> KA <b>AA</b> LE <b>AM</b> K <b>D</b>                                       |                                                                                                                      |           | 443       |
| Stil | TE <b>M</b> IK <b>R</b> AP <b>E</b> D <b>ARG</b> YS <b>NR</b> AA <b>AL</b> AK <b>LM</b> S <b>F</b> PE <b>AI</b> AD <b>C</b> N <b>KA</b> IE <b>K</b> DP <b>N</b> F <b>V</b> RA <b>Y</b> IR <b>K</b> ATA <b>Q</b> IA <b>V</b> KE                                              |                                                                                                                      |           | 479       |
| Tah1 | D <b>Q</b> L <b>I</b> T <b>A</b> Q <b>P</b> Q <b>N</b> P <b>V</b> G <b>YS</b> N <b>K</b> AM <b>AL</b> IK <b>L</b> GE <b>Y</b> T <b>Q</b> A <b>I</b> Q <b>M</b> C <b>Q</b> Q <b>GL</b> RY <b>T</b> ST <b>AE</b> H <b>V</b> A <b>IR</b> -SK <b>L</b> Q <b>Y</b> R <b>LE</b> L |                                                                                                                      |           | 86        |
|      | : * . * : . * : : * : . * : : * : : . . . : * : : :                                                                                                                                                                                                                         |                                                                                                                      |           |           |
|      | TPR2b-H3b                                                                                                                                                                                                                                                                   | TPR2b-Hc                                                                                                             |           |           |
| Hop  | Y <b>T</b> K <b>AM</b> D <b>V</b> Y <b>Q</b> K <b>AL</b> D <b>L</b> D-----SS <b>C</b> KE <b>AD</b> G <b>Y</b> Q <b>RC</b> MM <b>A</b> Q <b>YN</b> ---R <b>H</b> D <b>S</b> P <b>E</b> D <b>V</b> K <b>R</b> R <b>AM</b> D <b>PE</b>                                         |                                                                                                                      |           | 494       |
| Stil | Y <b>AS</b> A <b>LE</b> T <b>L</b> DA <b>ART</b> K <b>DA</b> EV <b>N</b> NG <b>S</b> S <b>ARE</b> ID <b>Q</b> LY <b>K</b> AS <b>Q</b> Q <b>R</b> F <b>Q</b> P <b>G</b> T <b>S</b> NET <b>P</b> E <b>E</b> TY <b>Q</b> R <b>AM</b> K <b>D</b> PE                             |                                                                                                                      |           | 539       |
| Tah1 | A <b>Q</b> G <b>A</b> V <b>G</b> S <b>V</b> Q <b>I</b> P <b>V</b> VE <b>V</b> -----DEL <b>P</b> E <b>G</b> Y <b>D</b> RS-----                                                                                                                                               |                                                                                                                      |           | 111       |
|      | * : : .                                                                                                                                                                                                                                                                     | * : * : .                                                                                                            |           |           |
| Hop  | V <b>Q</b> Q <b>IM</b> SD <b>P</b> AM <b>R</b> L <b>ILE</b> Q <b>M</b> Q <b>K</b> D <b>P</b> Q <b>AL</b> SE <b>HL</b> K <b>NP</b> V <b>IA</b> Q <b>K</b> I <b>Q</b> K <b>LM</b> D <b>V</b> GL <b>IA</b> IR-                                                                 |                                                                                                                      |           | 543       |
| Stil | V <b>AA</b> IM <b>Q</b> D <b>P</b> V <b>M</b> Q <b>S</b> IL <b>Q</b> Q <b>A</b> Q <b>Q</b> N <b>PA</b> AL <b>Q</b> E <b>H</b> M <b>K</b> N <b>PE</b> V <b>F</b> K <b>K</b> I <b>Q</b> T <b>L</b> IA <b>AG</b> I <b>IRT</b> GR                                               |                                                                                                                      |           | 589       |
| Tah1 | -----                                                                                                                                                                                                                                                                       | -----                                                                                                                |           |           |

Figure S1 See Figure legend on next page.

<sup>1</sup> To whom correspondence should be addressed (email chris.prodromou@icr.ac.uk).

### Figure S1 Amino-acid-sequence alignment of TPR-domain proteins, Hop, Sti1 and Tah1

The sequences were obtained from GenBank<sup>®</sup>. The accession numbers were: human Hop, NM\_006819; *Saccharomyces cerevisiae* Sti1, Z74935; and Tah1, NC\_001135. The sequence alignment was generated using Clustal W [1]. TPR1, 2a and 2b represent the TPR motifs. H1a-c, H2a-c and H3a-c represent the TPR domain helices. Residues shown in red are part of the TPR consensus as they are residues that are involved in packing interactions between  $\alpha$ -helices of neighbouring TPR motifs. Residues in green are part of the carboxylate clamp and other electrostatic interactions with the EEVD peptide, whereas those in cyan are involved in van der Waals contacts. Residues that are conserved between all three proteins are indicated "\*", ":", or ".".

### REFERENCES

- 1 Thompson, J. D., Higgins, D. G. and Gibson, T. J. (1994) CLUSTAL W: improving the sensitivity of progressive multiple sequence alignment through sequence weighting, position-specific gap penalties and weight matrix choice. *Nucleic Acids Res.* **22**, 4673–4680

---

Received 14 January 2008/11 April 2008; accepted 15 April 2008

Published as BJ Immediate Publication 15 April 2008, doi:10.1042/BJ20080105
